# Supplementary material
Source: MDPI journal article supplement (https://www.mdpi.com/2673-7256/3/2/17)
Supplement: s1 [file s1]

**Effect of benzophenone type UV filters on photodegradation of co-existing  
sulfamethoxazole in water**

Authors: Dilini Kodikara, Zhongyu Guo and Chihiro Yoshimura \*

Department of Civil and Environmental Engineering, Tokyo Institute of Technology,  
Tokyo 152-8552, Japan.

\*Corresponding author: [yoshimura.c.aa@m.titech.ac.jp](mailto:yoshimura.c.aa@m.titech.ac.jp)

## Supplementary materials

**Table S1.** Equations and calculations used in chemical actinometry experiment [53].

| Equation                                                                                                                               | Variable                |                                                                                                    |
|----------------------------------------------------------------------------------------------------------------------------------------|-------------------------|----------------------------------------------------------------------------------------------------|
| $\phi_{PNA} = 0.29[PYR]_0 + 0.00029$                                                                                                   | $\phi_{PNA}$            | Quantum yield of PNA (mol/Einstein)                                                                |
|                                                                                                                                        | $[pyr]_0$               | Initial PYR concentration ( $1 \times 10^{-2}$ M)                                                  |
| $E_{p,tot}^0 = \frac{k'[PNA]_0 l}{1000 \phi \sum_{\lambda} \rho_{\lambda} (1 - 10^{-\varepsilon_{\lambda} l [PNA]_0}) \Delta \lambda}$ | $E_{p,tot}^0$           | Photon irradiance (Einstein/cm <sup>2</sup> .s)                                                    |
|                                                                                                                                        | $k'$                    | PNA degradation rate constant (s <sup>-1</sup> ), experimentally calculated for each tube position |
|                                                                                                                                        | $l$                     | Optical path length (1.256 cm)                                                                     |
|                                                                                                                                        | $\rho_{\lambda}$        | Relative spectral photon irradiance (for each wavelength 280-400 nm, from the lamp manufacturer)   |
|                                                                                                                                        | $\varepsilon_{\lambda}$ | PNA molar absorption coefficient at each wavelength (/M.cm) from (1)                               |
|                                                                                                                                        | $[PNA]_0$               | Initial PNA concentration ( $1 \times 10^{-5}$ M)                                                  |
|                                                                                                                                        | $\Delta \lambda$        | Wavelength resolution (1 nm)                                                                       |
|                                                                                                                                        |                         |                                                                                                    |

**Table S2.** Results of the data analysis of indirect photodegradation induced by the BPs in the experimental system. “-” indicates not applicable and “n.d.” indicates that the calculation was not applied due to the inhibition of the photodegradation of SMX at those BP or BP3 ratios.

| [BP or BP3]/<br>[SMX] | SMX + BP |                                                        |                                                    |                                                    |                                                  | SMX + BP3 |                                                         |                                                    |                                                    |                                                   |
|-----------------------|----------|--------------------------------------------------------|----------------------------------------------------|----------------------------------------------------|--------------------------------------------------|-----------|---------------------------------------------------------|----------------------------------------------------|----------------------------------------------------|---------------------------------------------------|
|                       | <i>S</i> | $k_{obs\_BP}$<br>(h <sup>-1</sup> ) × 10 <sup>-2</sup> | $k_{d+s}$<br>(h <sup>-1</sup> ) × 10 <sup>-2</sup> | $k_{ind}$<br>(h <sup>-1</sup> ) × 10 <sup>-3</sup> | $k_{ind}$ as a<br>percentage of<br>$k_{obs\_BP}$ | <i>S</i>  | $k_{obs\_BP3}$<br>(h <sup>-1</sup> ) × 10 <sup>-2</sup> | $k_{d+s}$<br>(h <sup>-1</sup> ) × 10 <sup>-2</sup> | $k_{ind}$<br>(h <sup>-1</sup> ) × 10 <sup>-3</sup> | $k_{ind}$ as a<br>percentage of<br>$k_{obs\_BP3}$ |
| <b>0.00</b>           | -        | -                                                      | 2.23                                               | -                                                  | -                                                | -         | -                                                       | 2.23                                               | -                                                  | -                                                 |
| <b>0.10</b>           | 0.998    | 3.03                                                   | 2.22                                               | 8.11                                               | 26.7                                             | 0.992     | 2.93                                                    | 2.21                                               | 7.18                                               | 24.5                                              |
| <b>0.25</b>           | 0.993    | 3.34                                                   | 2.21                                               | 11.30                                              | 33.8                                             | 0.985     | 3.03                                                    | 2.19                                               | 8.40                                               | 27.7                                              |
| <b>0.30</b>           | 0.993    | 2.39                                                   | 2.21                                               | 1.77                                               | 7.4                                              | n.d.      | n.d.                                                    | n.d.                                               | n.d.                                               | n.d.                                              |
| <b>0.40</b>           | 0.995    | 2.49                                                   | 2.22                                               | 2.73                                               | 11.0                                             | n.d.      | n.d.                                                    | n.d.                                               | n.d.                                               | n.d.                                              |
| <b>0.50</b>           | 0.991    | 2.39                                                   | 2.21                                               | 1.82                                               | 7.6                                              | 0.980     | 2.25                                                    | 2.18                                               | 0.64                                               | 2.8                                               |
| <b>0.60</b>           | n.d.     | n.d.                                                   | n.d.                                               | n.d.                                               | n.d.                                             | n.d.      | n.d.                                                    | n.d.                                               | n.d.                                               | n.d.                                              |
| <b>0.75</b>           | 0.992    | 2.27                                                   | 2.21                                               | 0.61                                               | 2.7                                              | n.d.      | n.d.                                                    | n.d.                                               | n.d.                                               | n.d.                                              |
| <b>0.90</b>           | 0.993    | 2.54                                                   | 2.21                                               | 3.31                                               | 13.0                                             | n.d.      | n.d.                                                    | n.d.                                               | n.d.                                               | n.d.                                              |
| <b>1.00</b>           | 0.990    | 2.41                                                   | 2.21                                               | 2.04                                               | 8.5                                              | n.d.      | n.d.                                                    | n.d.                                               | n.d.                                               | n.d.                                              |

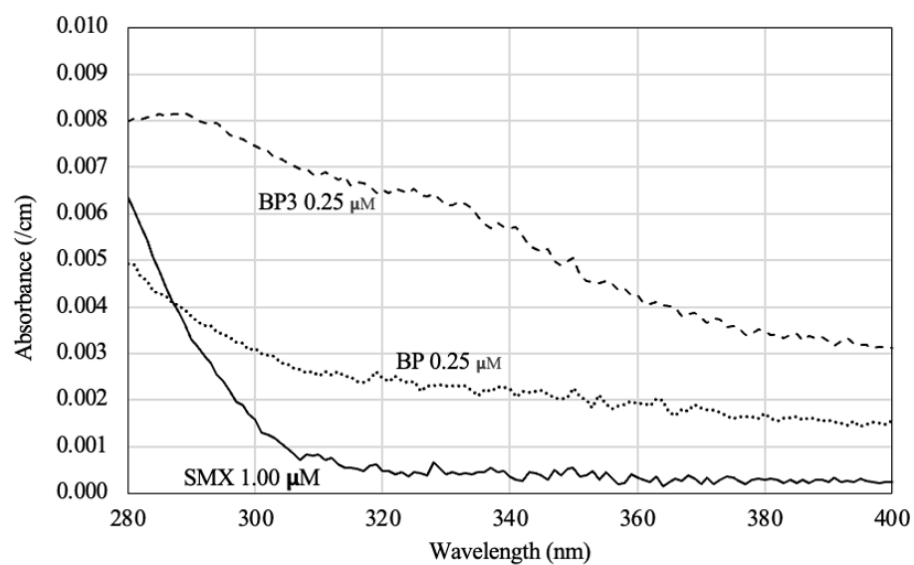

**Figure S1.** UV absorbance spectra from 280 nm to 400 nm for 1.00  $\mu$ M of SMX and 0.25  $\mu$ M of BP and BP3 measured using UV-vis spectrophotometer (UV1800, Shimadzu, Japan).
